# Supplementary material
Source: publisher figshare collection journal article supplement (https://acs.figshare.com/ndownloader/files/4603087)

# Synthesis and photophysical properties of poly(ester-amine) dendrimers with focal 4-amino-N-benzyl-phthalimide, as sensitive media probes and switchable proton sensors

*Daxin Shi, Yaowu Sha,\* Feng Wang, Qingyong Tian*

|         |                                               |          |
|---------|-----------------------------------------------|----------|
| Page 2  | <b>ESI-MS</b> spectrum of compound            | <b>2</b> |
| Page 3  | <b><sup>1</sup>H NMR</b> spectrum of compound | <b>2</b> |
| Page 4  | <b>ESI-MS</b> spectrum of compound            | <b>3</b> |
| Page 5  | <b><sup>1</sup>H NMR</b> spectrum of compound | <b>3</b> |
| Page 6  | <b>ESI-MS</b> spectrum of compound            | <b>4</b> |
| Page 7  | <b><sup>1</sup>H NMR</b> spectrum of compound | <b>4</b> |
| Page 8  | <b>ESI-MS</b> spectrum of compound            | <b>5</b> |
| Page 9  | <b><sup>1</sup>H NMR</b> spectrum of compound | <b>5</b> |
| Page 10 | <b>ESI-MS</b> spectrum of compound            | <b>6</b> |
| Page 11 | <b><sup>1</sup>H NMR</b> spectrum of compound | <b>6</b> |
| Page 12 | <b>ESI-MS</b> spectrum of compound            | <b>7</b> |
| Page 13 | <b><sup>1</sup>H NMR</b> spectrum of compound | <b>7</b> |
| Page 14 | <b>ESI-MS</b> spectrum of compound            | <b>8</b> |
| Page 15 | <b><sup>1</sup>H NMR</b> spectrum of compound | <b>8</b> |
| Page 16 | <b>ESI-MS</b> spectrum of compound            | <b>9</b> |
| Page 17 | <b><sup>1</sup>H NMR</b> spectrum of compound | <b>9</b> |

# Mass Spectrum List Report

## Analysis Info

Analysis Name sdx00076.d  
Method XQ Default.ms  
Sample Name 1  
Comment 3-306

Acquisition Date 11/22/05 16:01:18  
Operator Administrator  
Instrument Esquire-LC\_00136

## Acquisition Parameter

|                   |            |              |            |                          |            |
|-------------------|------------|--------------|------------|--------------------------|------------|
| Ion Source Type   | ESI        | Ion Polarity | Positive   | Alternating Ion Polarity | n/a        |
| Mass Range Mode   | Std/Normal | Scan Begin   | 150.00 m/z | Scan End                 | 500.00 m/z |
| Capillary Exit    | 100.2 Volt | Skim 1       | 29.2 Volt  | Trap Drive               | 31.9       |
| Accumulation Time | 32209 µs   | Averages     | 5 Spectra  | Auto MS/MS               | Off        |

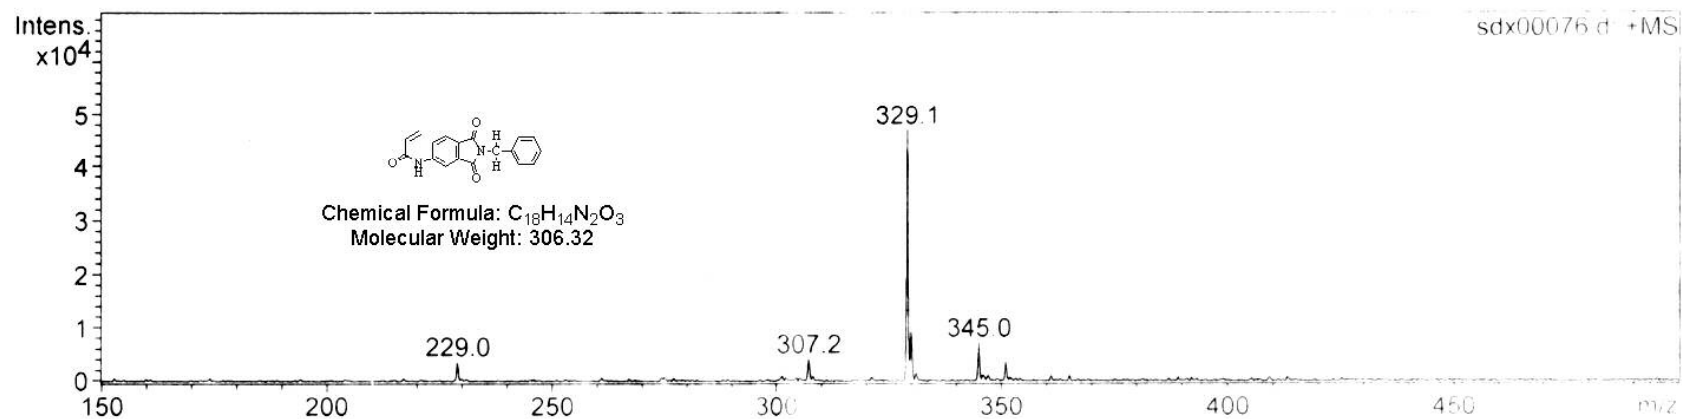

| #  | m/z   | I     | FWHM | S/N   |
|----|-------|-------|------|-------|
| 1  | 229.0 | 3538  | 0.4  | 48.4  |
| 2  | 301.2 | 1049  | 0.4  | 14.3  |
| 3  | 307.2 | 4083  | 0.5  | 55.8  |
| 4  | 329.1 | 46903 | 0.4  | 641.0 |
| 5  | 330.0 | 9162  | 0.4  | 125.2 |
| 6  | 331.1 | 1621  | 0.4  | 22.2  |
| 7  | 345.0 | 7134  | 0.4  | 97.5  |
| 8  | 345.9 | 1147  | 0.6  | 15.7  |
| 9  | 351.0 | 3712  | 0.4  | 50.7  |
| 10 | 361.0 | 1010  | 0.4  | 13.8  |

Page 3:  $^1\text{H}$  NMR spectrum of compound 2

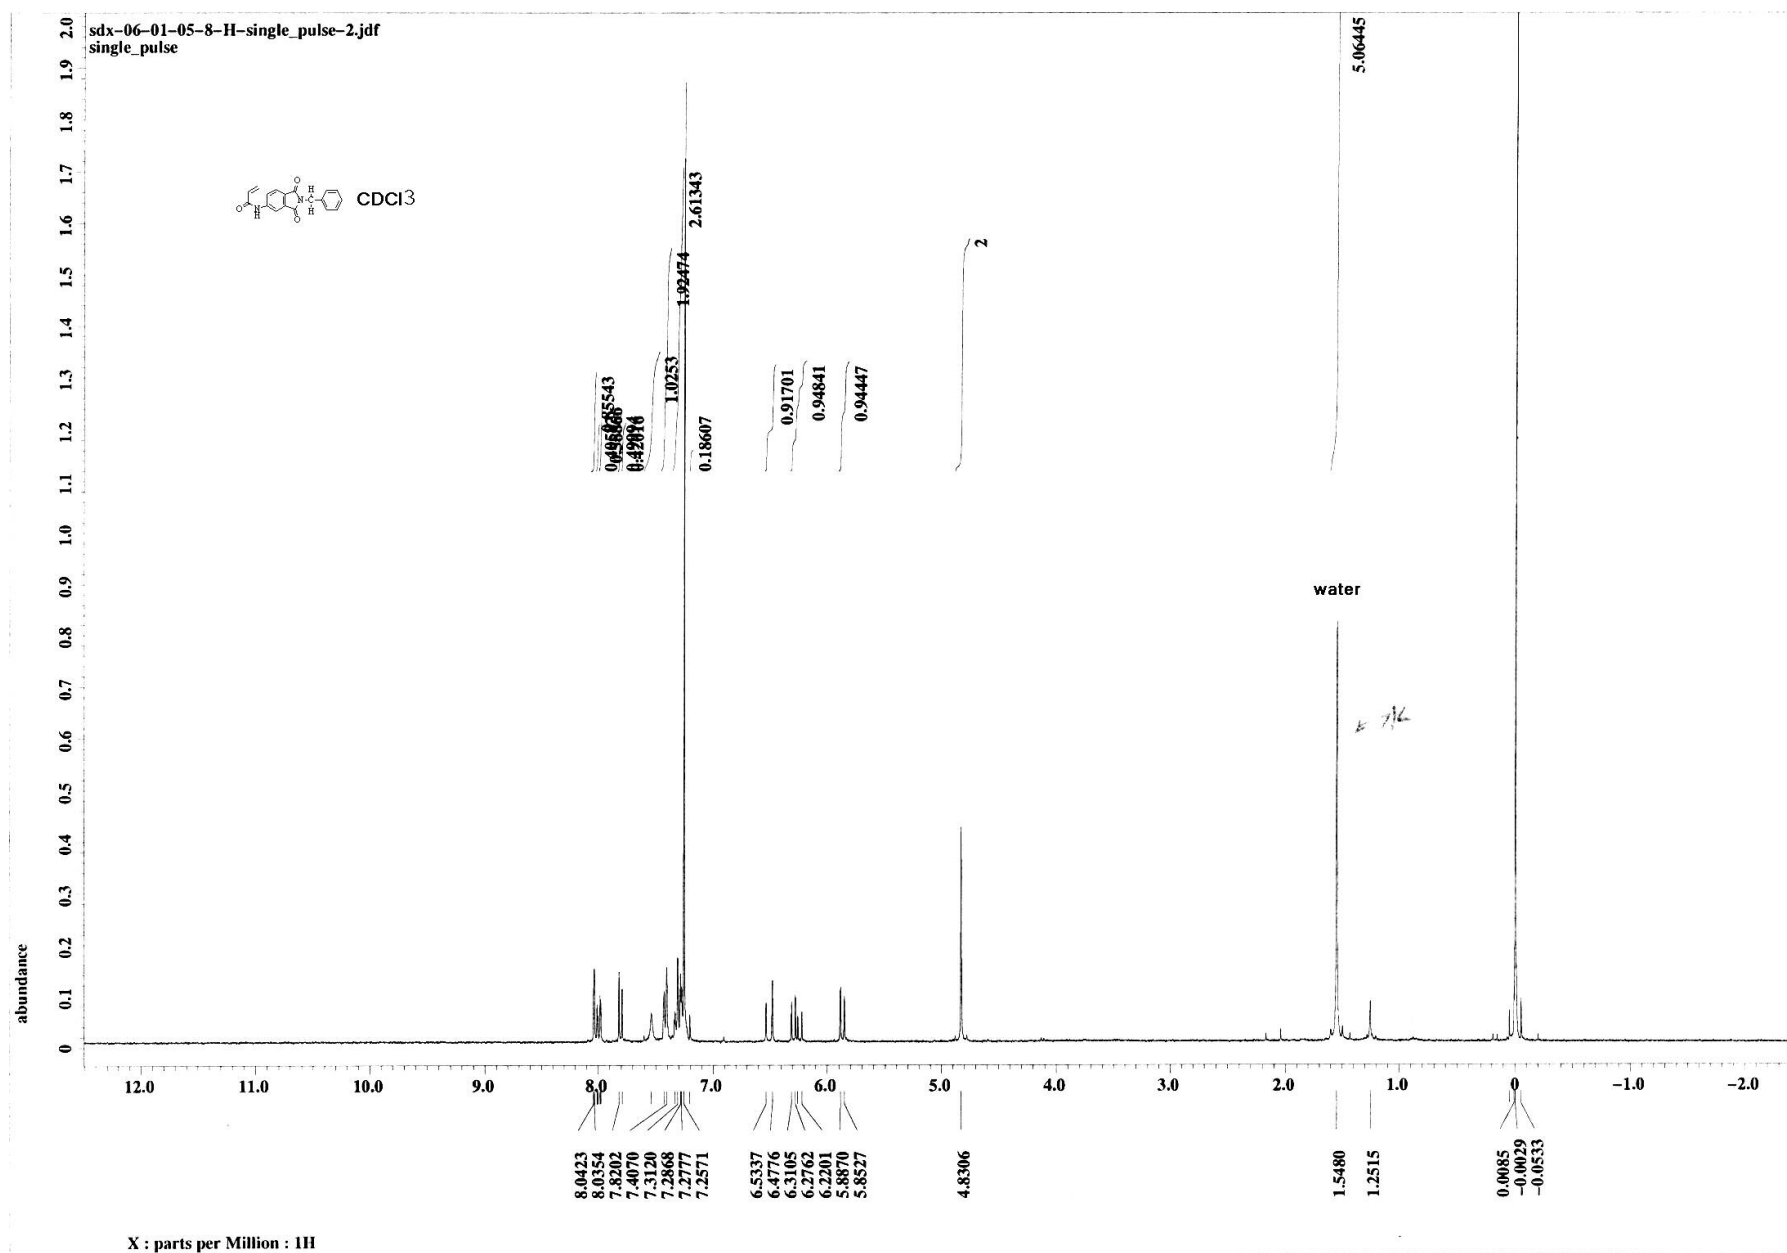

## Mass Spectrum List Report

## Analysis Info

Analysis Name sdX00077.d  
Method XQ Default.ms  
Sample Name 1  
Comment 4-410

Acquisition Date 11/22/05 16:05:18  
Operator Administrator  
Instrument Esquire-LC\_00136

## Acquisition Parameter

|                   |              |              |           |                          |            |
|-------------------|--------------|--------------|-----------|--------------------------|------------|
| Ion Source Type   | ESI          | Ion Polarity | Positive  | Alternating Ion Polarity | n/a        |
| Mass Range Mode   | Std/Normal   | Scan Begin   | 50.00 m/z | Scan End                 | 800.00 m/z |
| Capillary Exit    | 107.3 Volt   | Skim 1       | 34.4 Volt | Trap Drive               | 36.6       |
| Accumulation Time | 4792 $\mu$ s | Averages     | 5 Spectra | Auto MS/MS               | Off        |

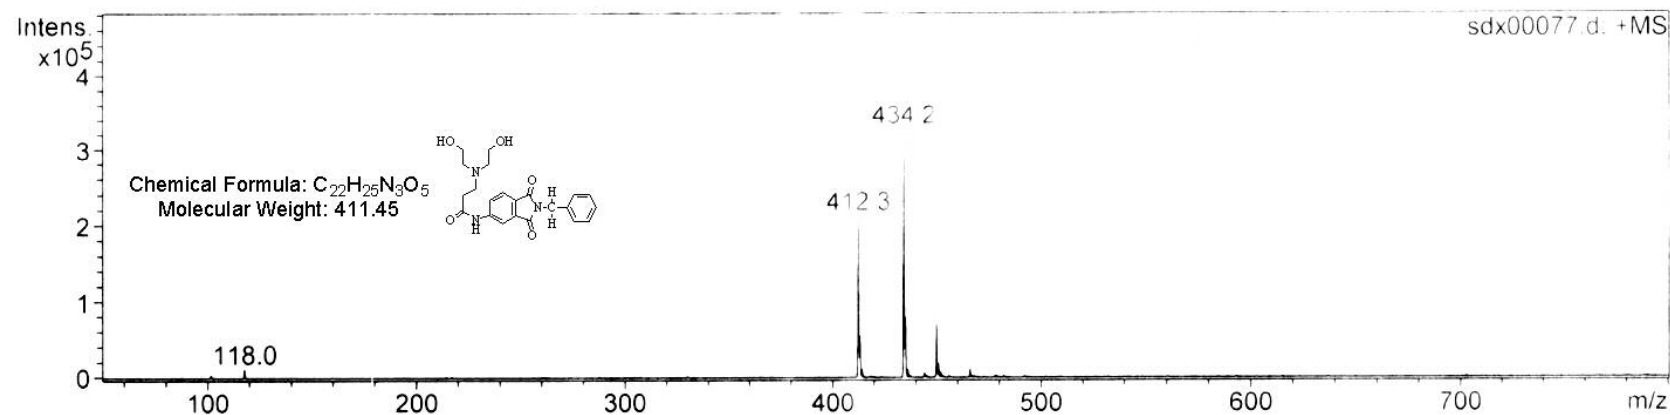

| #  | m/z   | I      | FWHM | S/N    |
|----|-------|--------|------|--------|
| 1  | 118.0 | 10801  | 0.4  | 131.9  |
| 2  | 412.3 | 210736 | 0.5  | 2572.8 |
| 3  | 413.1 | 54038  | 0.4  | 659.7  |
| 4  | 414.3 | 10566  | 0.4  | 129.0  |
| 5  | 434.2 | 326420 | 0.4  | 3985.1 |
| 6  | 434.9 | 78306  | 0.4  | 956.0  |
| 7  | 436.1 | 10217  | 0.4  | 124.7  |
| 8  | 450.0 | 69376  | 0.4  | 847.0  |
| 9  | 450.9 | 17876  | 0.4  | 218.2  |
| 10 | 466.0 | 10419  | 0.4  | 127.2  |

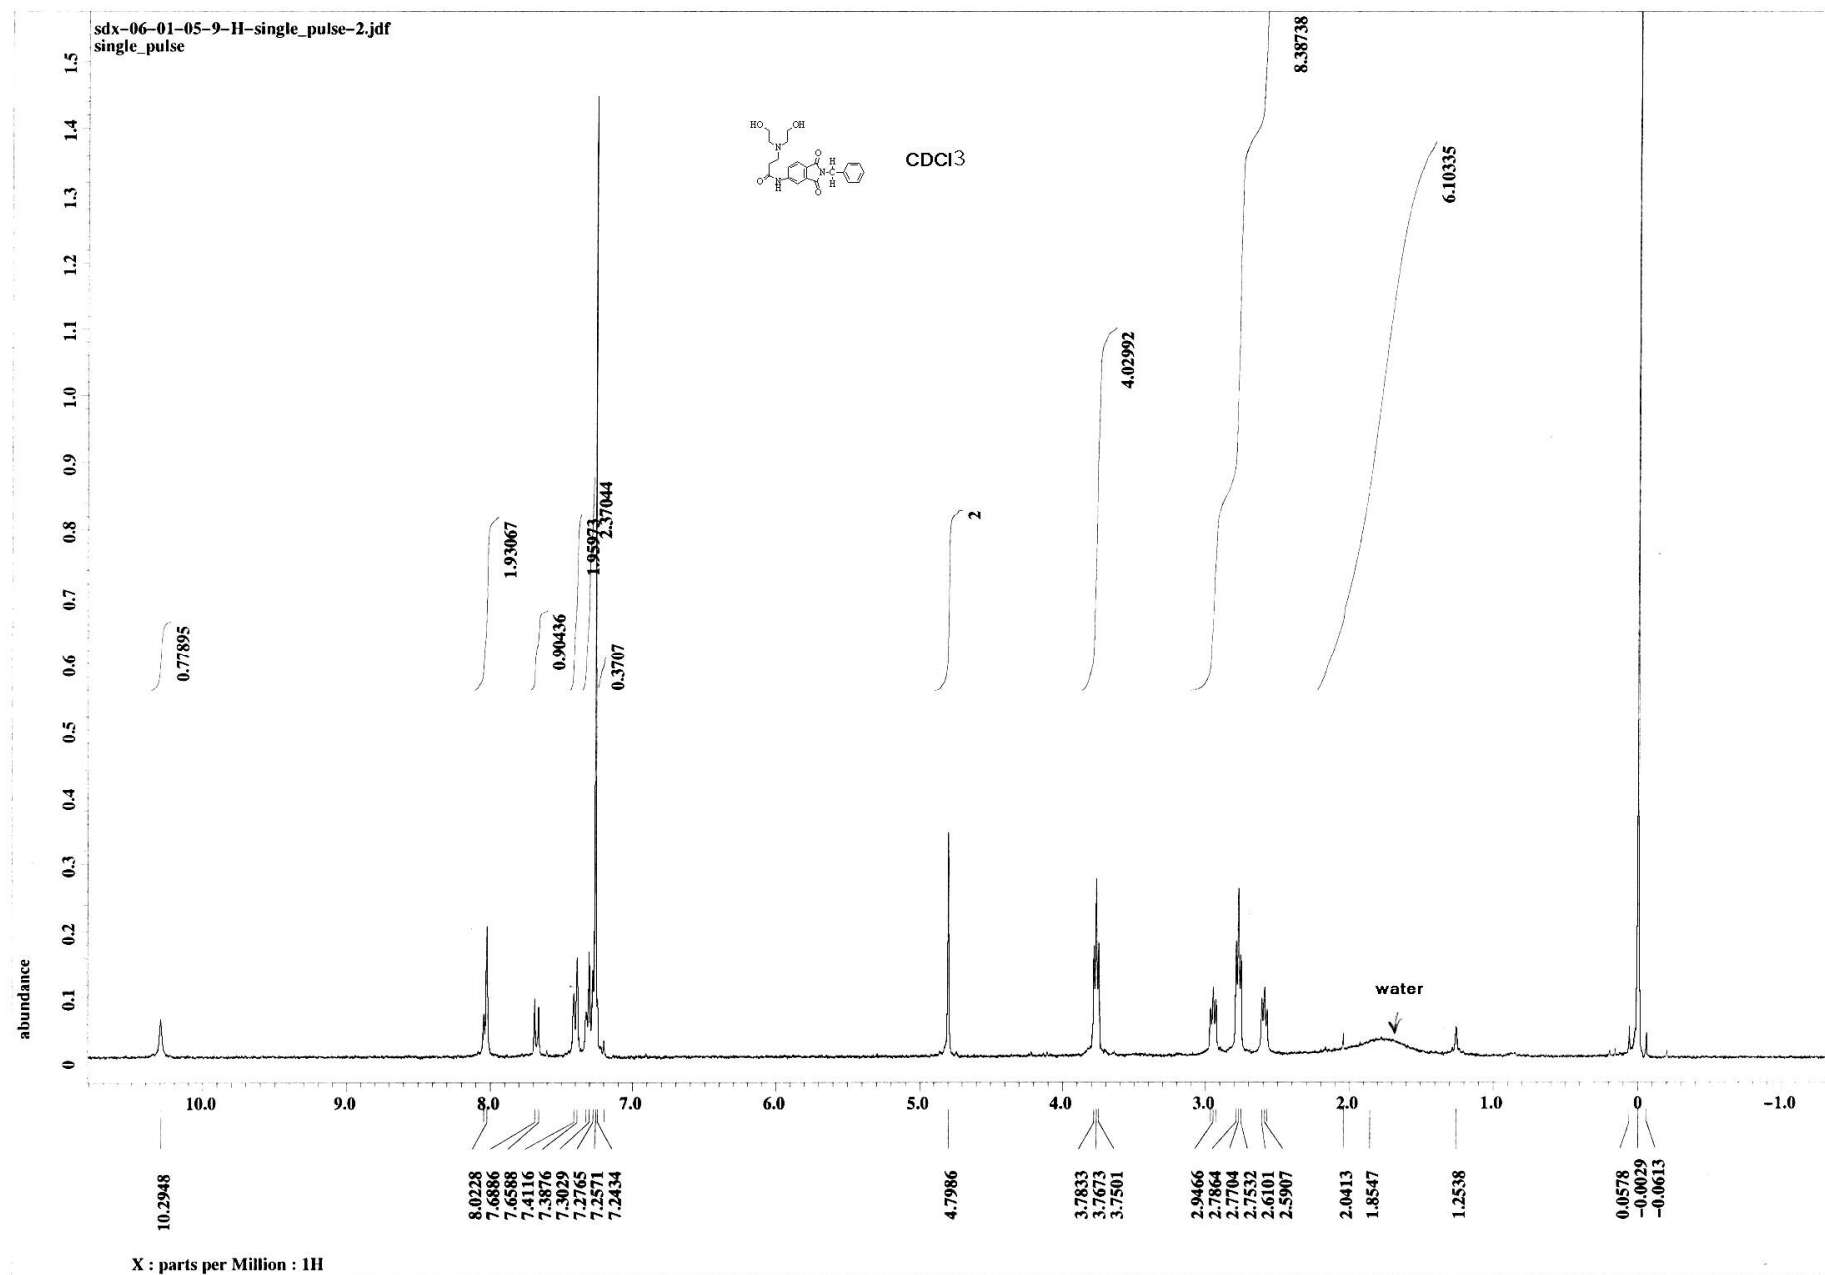

# Mass Spectrum List Report

## Analysis Info

Analysis Name sdx00079.d  
Method XQ Default.ms  
Sample Name 1  
Comment 5-520

Acquisition Date 11/22/05 16:09:50  
Operator Administrator  
Instrument Esquire-LC\_00136

## Acquisition Parameter

|                   |            |              |           |                          |             |
|-------------------|------------|--------------|-----------|--------------------------|-------------|
| Ion Source Type   | ESI        | Ion Polarity | Positive  | Alternating Ion Polarity | n/a         |
| Mass Range Mode   | Std/Normal | Scan Begin   | 50.00 m/z | Scan End                 | 1000.00 m/z |
| Capillary Exit    | 114.3 Volt | Skim 1       | 39.1 Volt | Trap Drive               | 41.6        |
| Accumulation Time | 5610 µs    | Averages     | 5 Spectra | Auto MS/MS               | Off         |

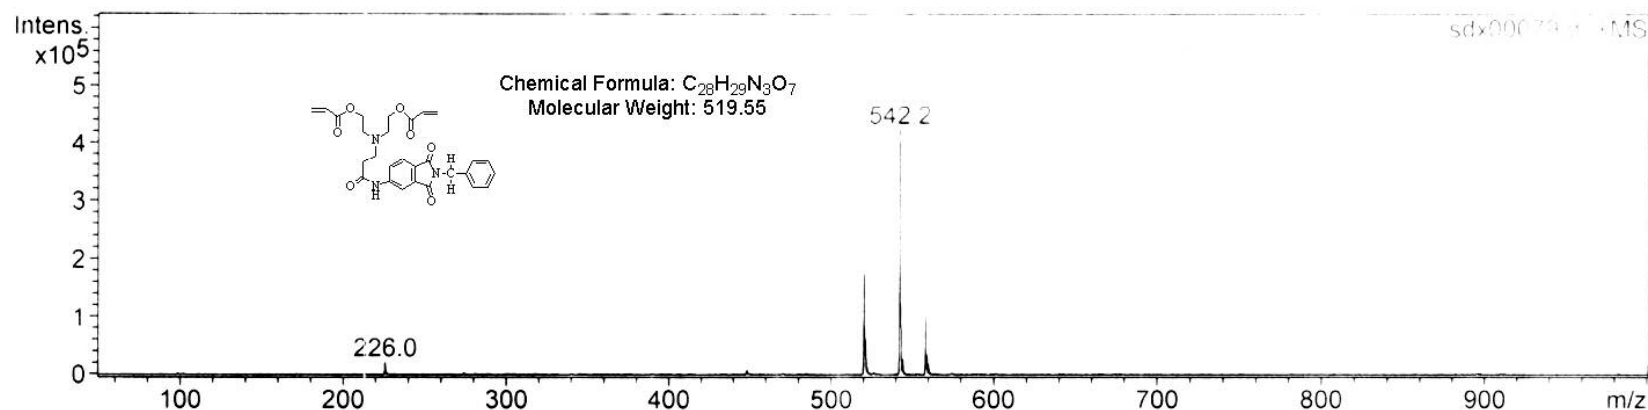

| #  | m/z   | I      | FWHM | S/N    |
|----|-------|--------|------|--------|
| 1  | 226.0 | 20423  | 0.5  | 166.5  |
| 2  | 520.4 | 174288 | 0.5  | 1421.1 |
| 3  | 521.2 | 61466  | 0.5  | 501.2  |
| 4  | 522.3 | 12491  | 0.5  | 101.8  |
| 5  | 542.2 | 422547 | 0.4  | 3445.3 |
| 6  | 542.9 | 123761 | 0.4  | 1009.1 |
| 7  | 544.1 | 26031  | 0.4  | 212.3  |
| 8  | 558.1 | 104195 | 0.4  | 849.6  |
| 9  | 559.0 | 34233  | 0.4  | 279.1  |
| 10 | 560.0 | 18092  | 0.4  | 147.5  |

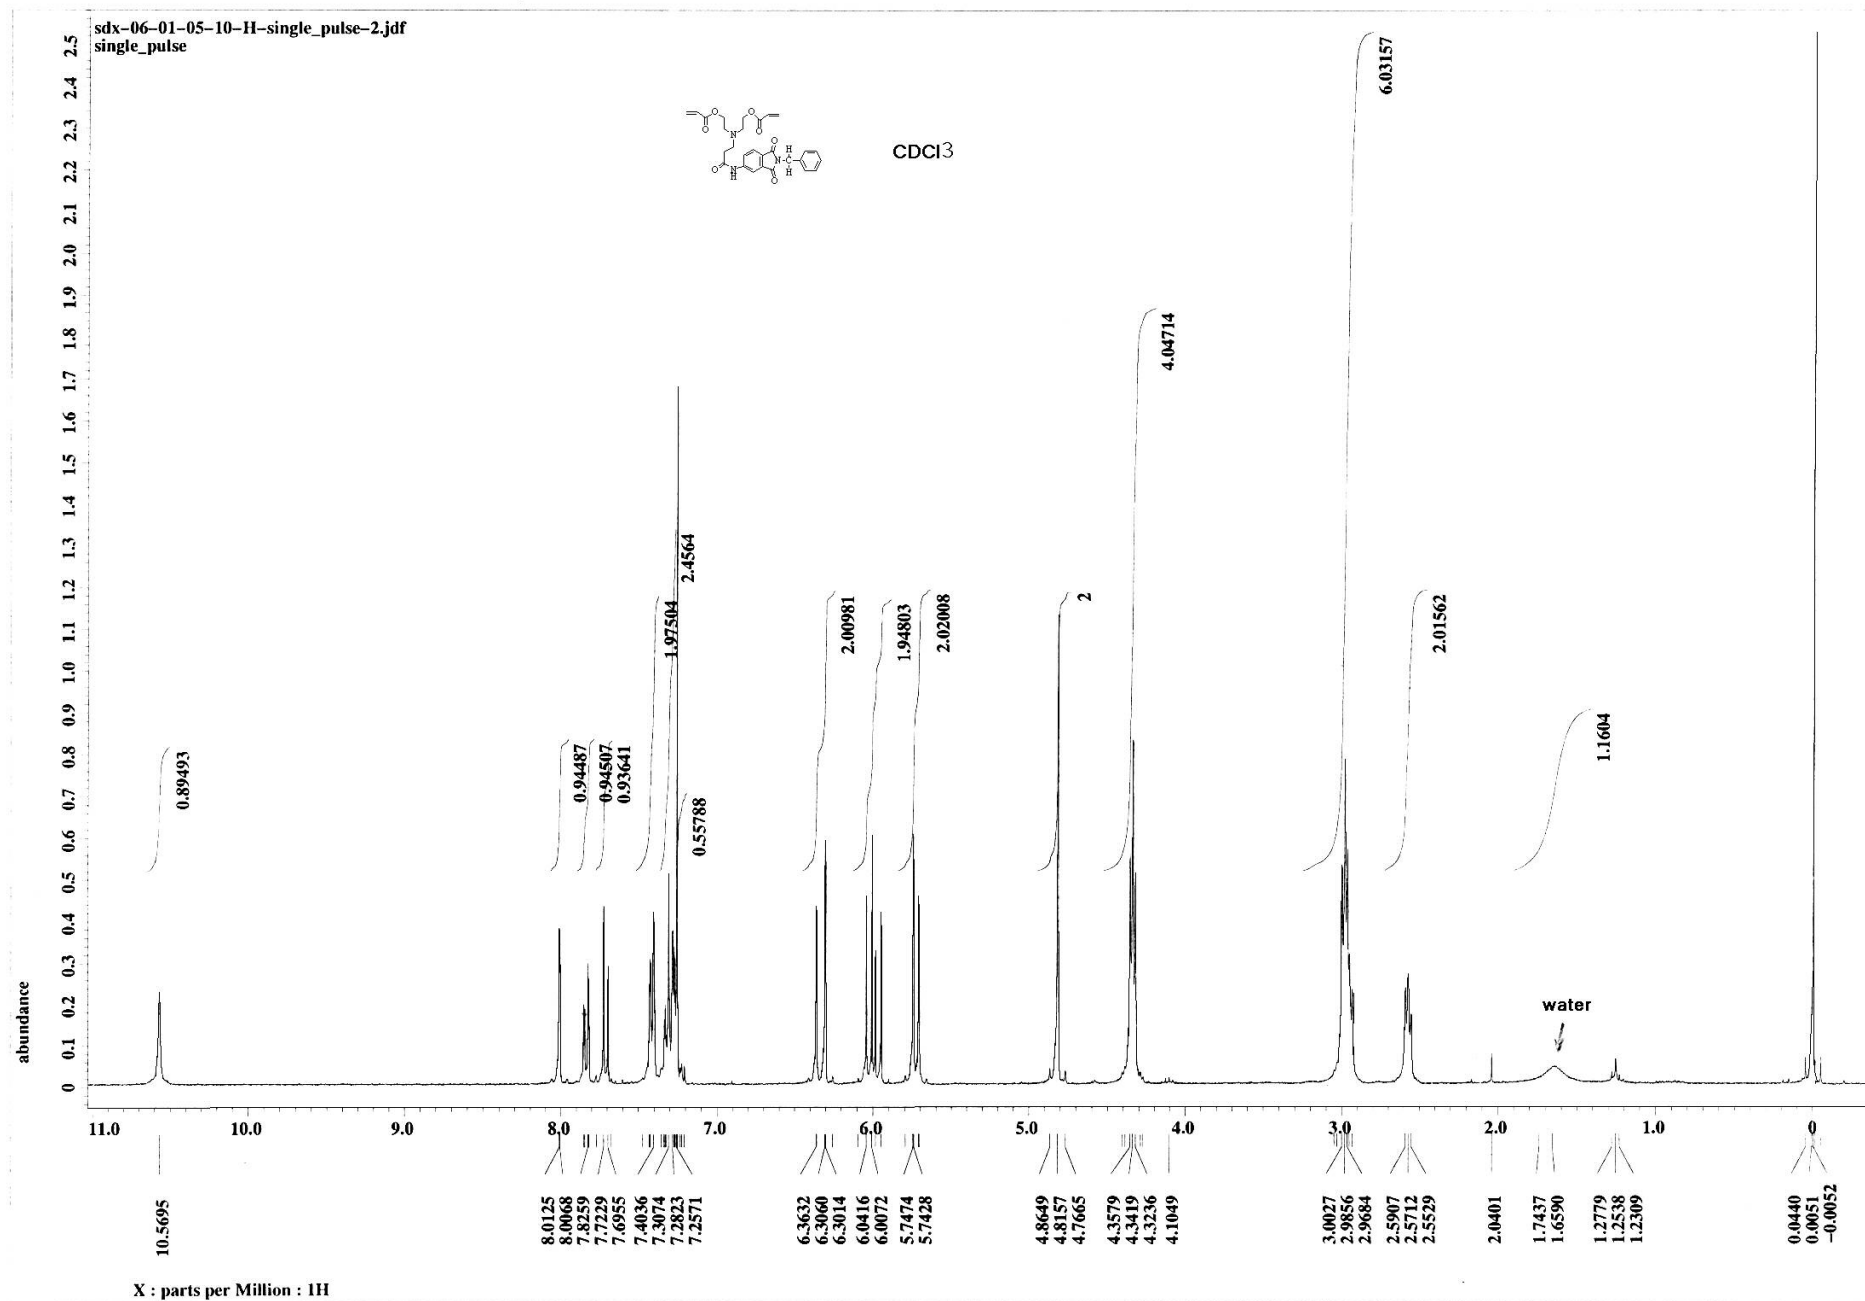

## Mass Spectrum List Report

## Analysis Info

Analysis Name sdx00072.d  
Method XQ Default.ms  
Sample Name 1  
Comment 1

Acquisition Date 11/07/05 15:28:50  
Operator Administrator  
Instrument Esquire-LC\_00136

## Acquisition Parameter

|                   |             |              |           |                          |             |
|-------------------|-------------|--------------|-----------|--------------------------|-------------|
| Ion Source Type   | ESI         | Ion Polarity | Positive  | Alternating Ion Polarity | n/a         |
| Mass Range Mode   | Std/Normal  | Scan Begin   | 50.00 m/z | Scan End                 | 1000.00 m/z |
| Capillary Exit    | 126.2 Volt  | Skim 1       | 47.0 Volt | Trap Drive               | 51.2        |
| Accumulation Time | 669 $\mu$ s | Averages     | 5 Spectra | Auto MS/MS               | Off         |

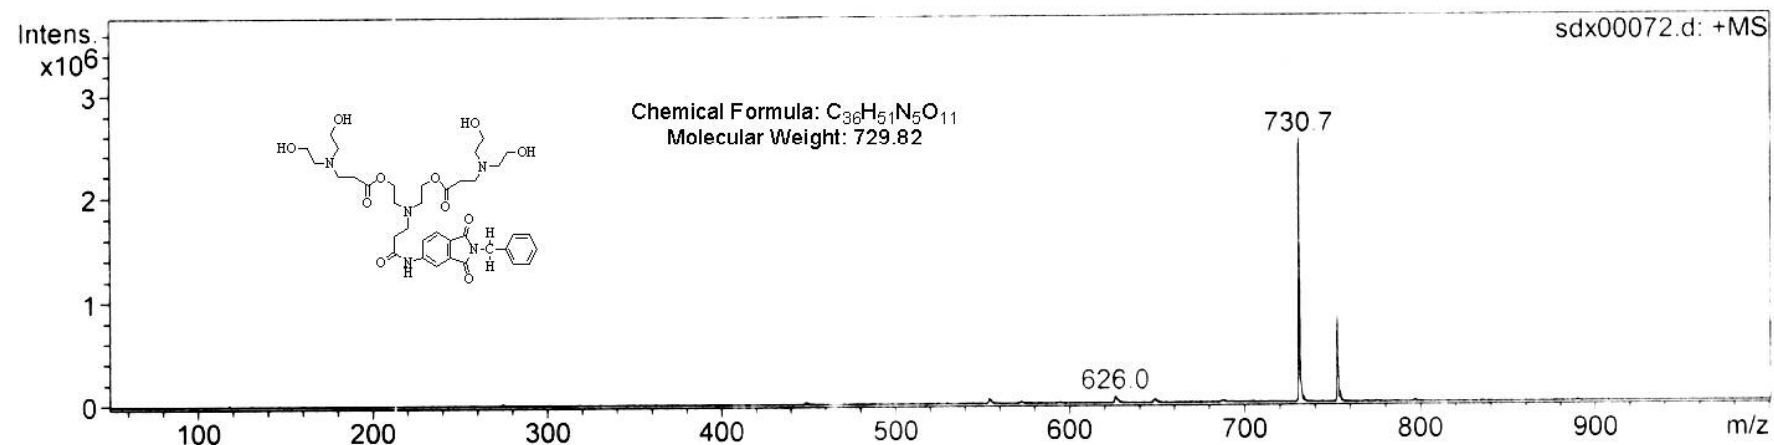

| # | m/z   | I       | FWHM | S/N    |
|---|-------|---------|------|--------|
| 1 | 626.0 | 69013   | 0.5  | 133.1  |
| 2 | 626.4 | 60791   | 0.2  | 117.2  |
| 3 | 730.7 | 2545781 | 0.6  | 4908.1 |
| 4 | 731.8 | 197249  | 0.5  | 380.3  |
| 5 | 733.5 | 54502   | 0.4  | 105.1  |
| 6 | 752.4 | 836530  | 0.4  | 1612.8 |
| 7 | 753.0 | 345745  | 0.4  | 666.6  |
| 8 | 754.2 | 98032   | 0.4  | 189.0  |



abundance

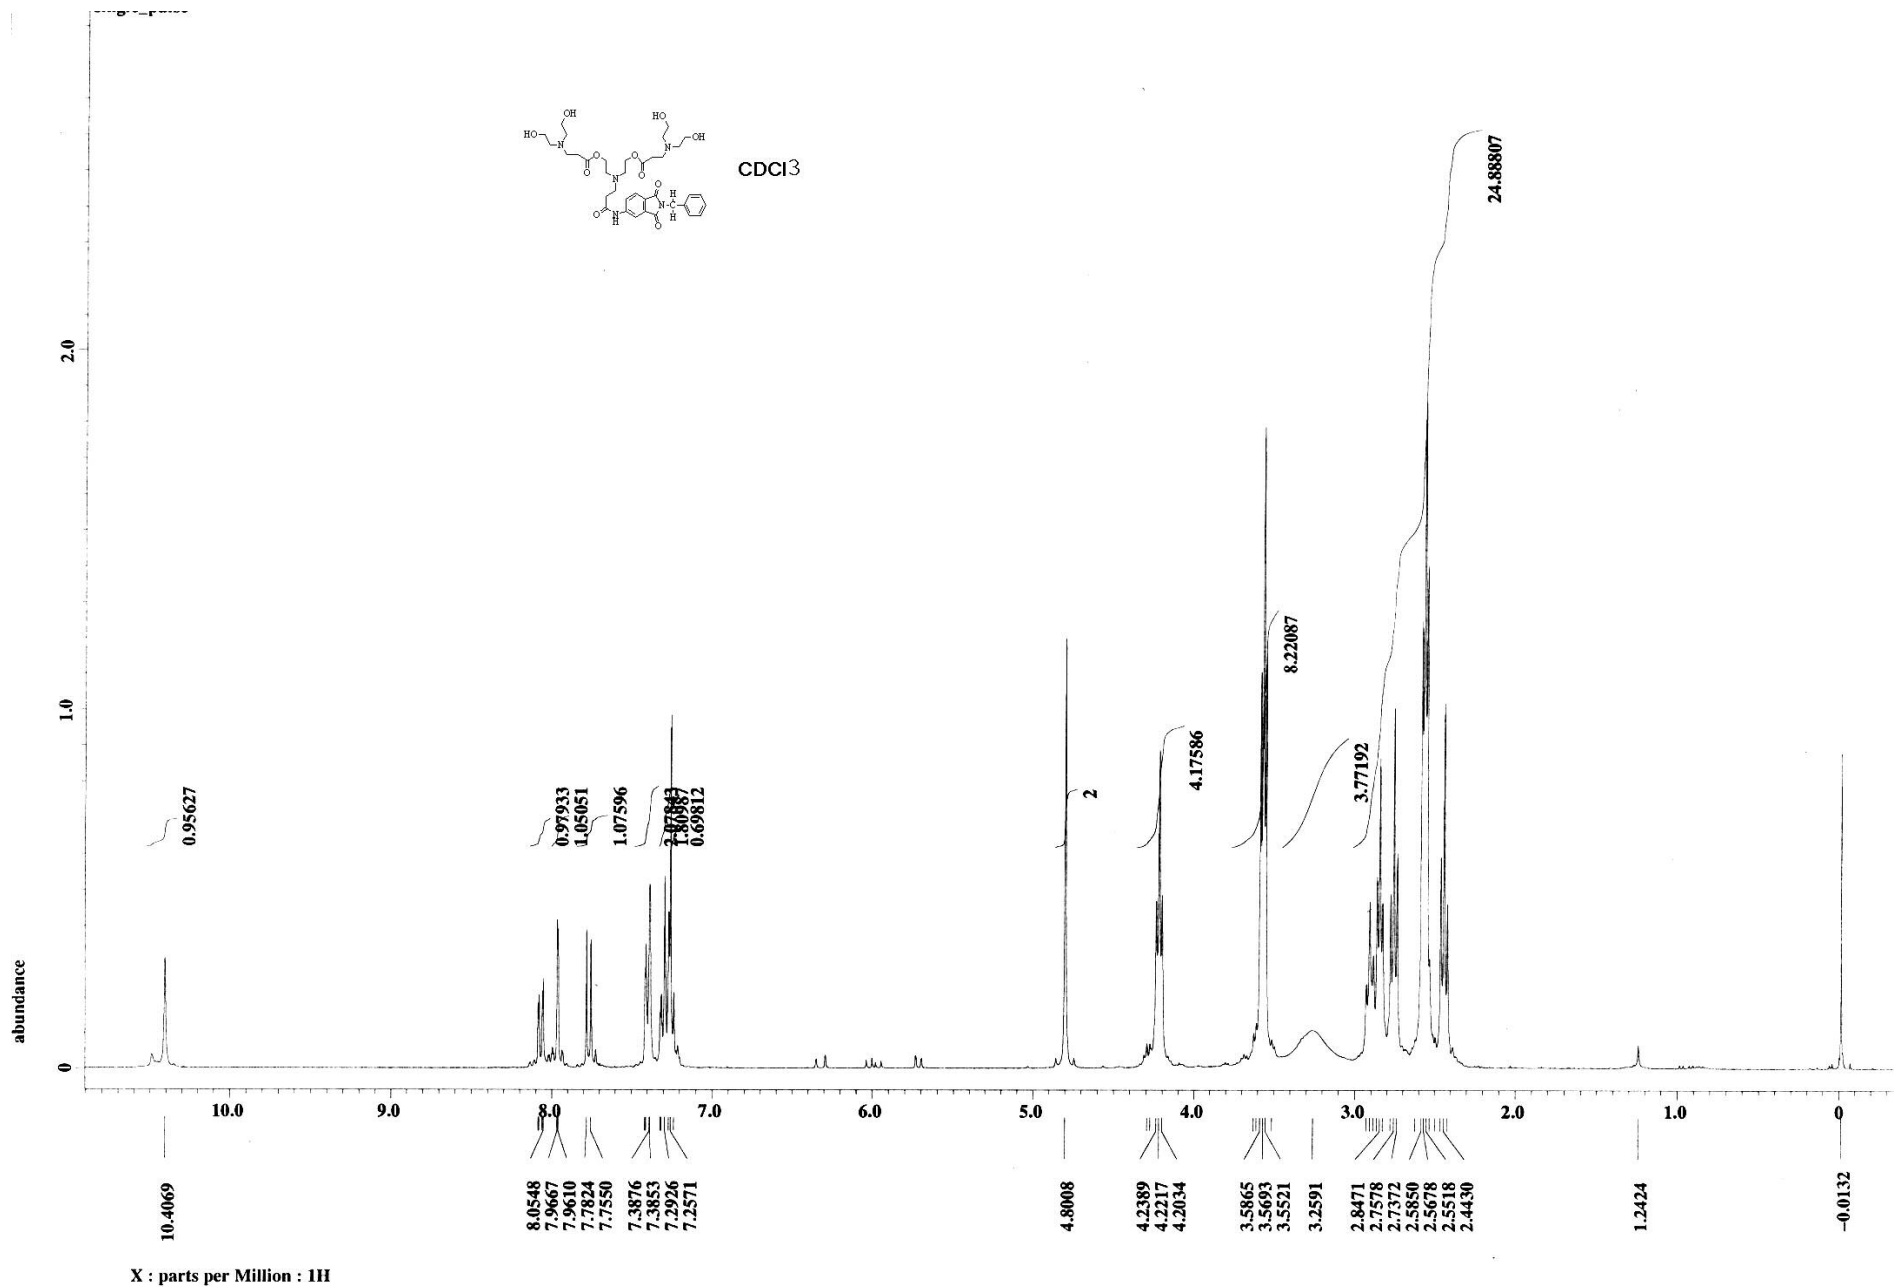

## Mass Spectrum List Report

## Analysis Info

Analysis Name sdx00087.d  
Method XQ Default.ms  
Sample Name 1  
Comment 2

Acquisition Date 11/29/05 10:34:00  
Operator Administrator  
Instrument Esquire-LC\_00136

## Acquisition Parameter

|                   |             |              |            |                          |             |
|-------------------|-------------|--------------|------------|--------------------------|-------------|
| Ion Source Type   | ESI         | Ion Polarity | Positive   | Alternating Ion Polarity | n/a         |
| Mass Range Mode   | Std/Normal  | Scan Begin   | 100.00 m/z | Scan End                 | 1100.00 m/z |
| Capillary Exit    | 148.7 Volt  | Skim 1       | 60.8 Volt  | Trap Drive               | 60.9        |
| Accumulation Time | 454 $\mu$ s | Averages     | 10 Spectra | Auto MS/MS               | Off         |

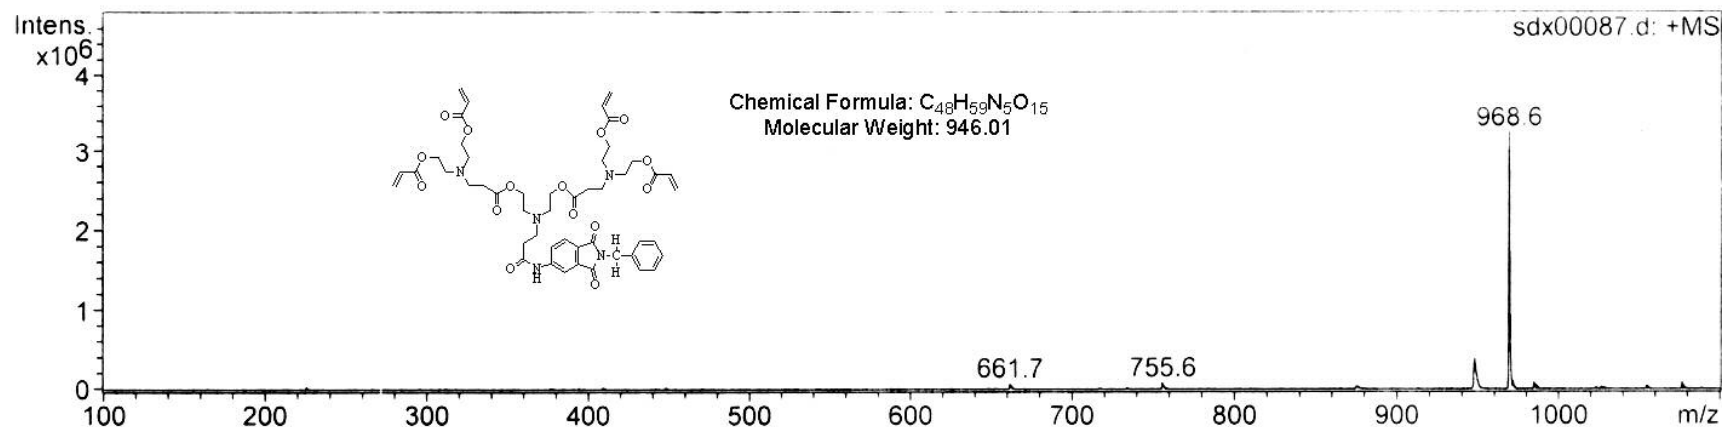

| # | m/z    | I       | FWHM | S/N    |
|---|--------|---------|------|--------|
| 1 | 661.7  | 65429   | 0.5  | 104.3  |
| 2 | 755.6  | 74798   | 0.6  | 119.3  |
| 3 | 947.5  | 393937  | 1.3  | 628.2  |
| 4 | 948.7  | 179951  | 0.5  | 287.0  |
| 5 | 949.5  | 102418  | 0.4  | 163.3  |
| 6 | 968.6  | 3257314 | 0.7  | 5194.3 |
| 7 | 971.2  | 104799  | 0.5  | 167.1  |
| 8 | 984.1  | 86144   | 0.6  | 137.4  |
| 9 | 1076.2 | 87389   | 0.4  | 139.4  |

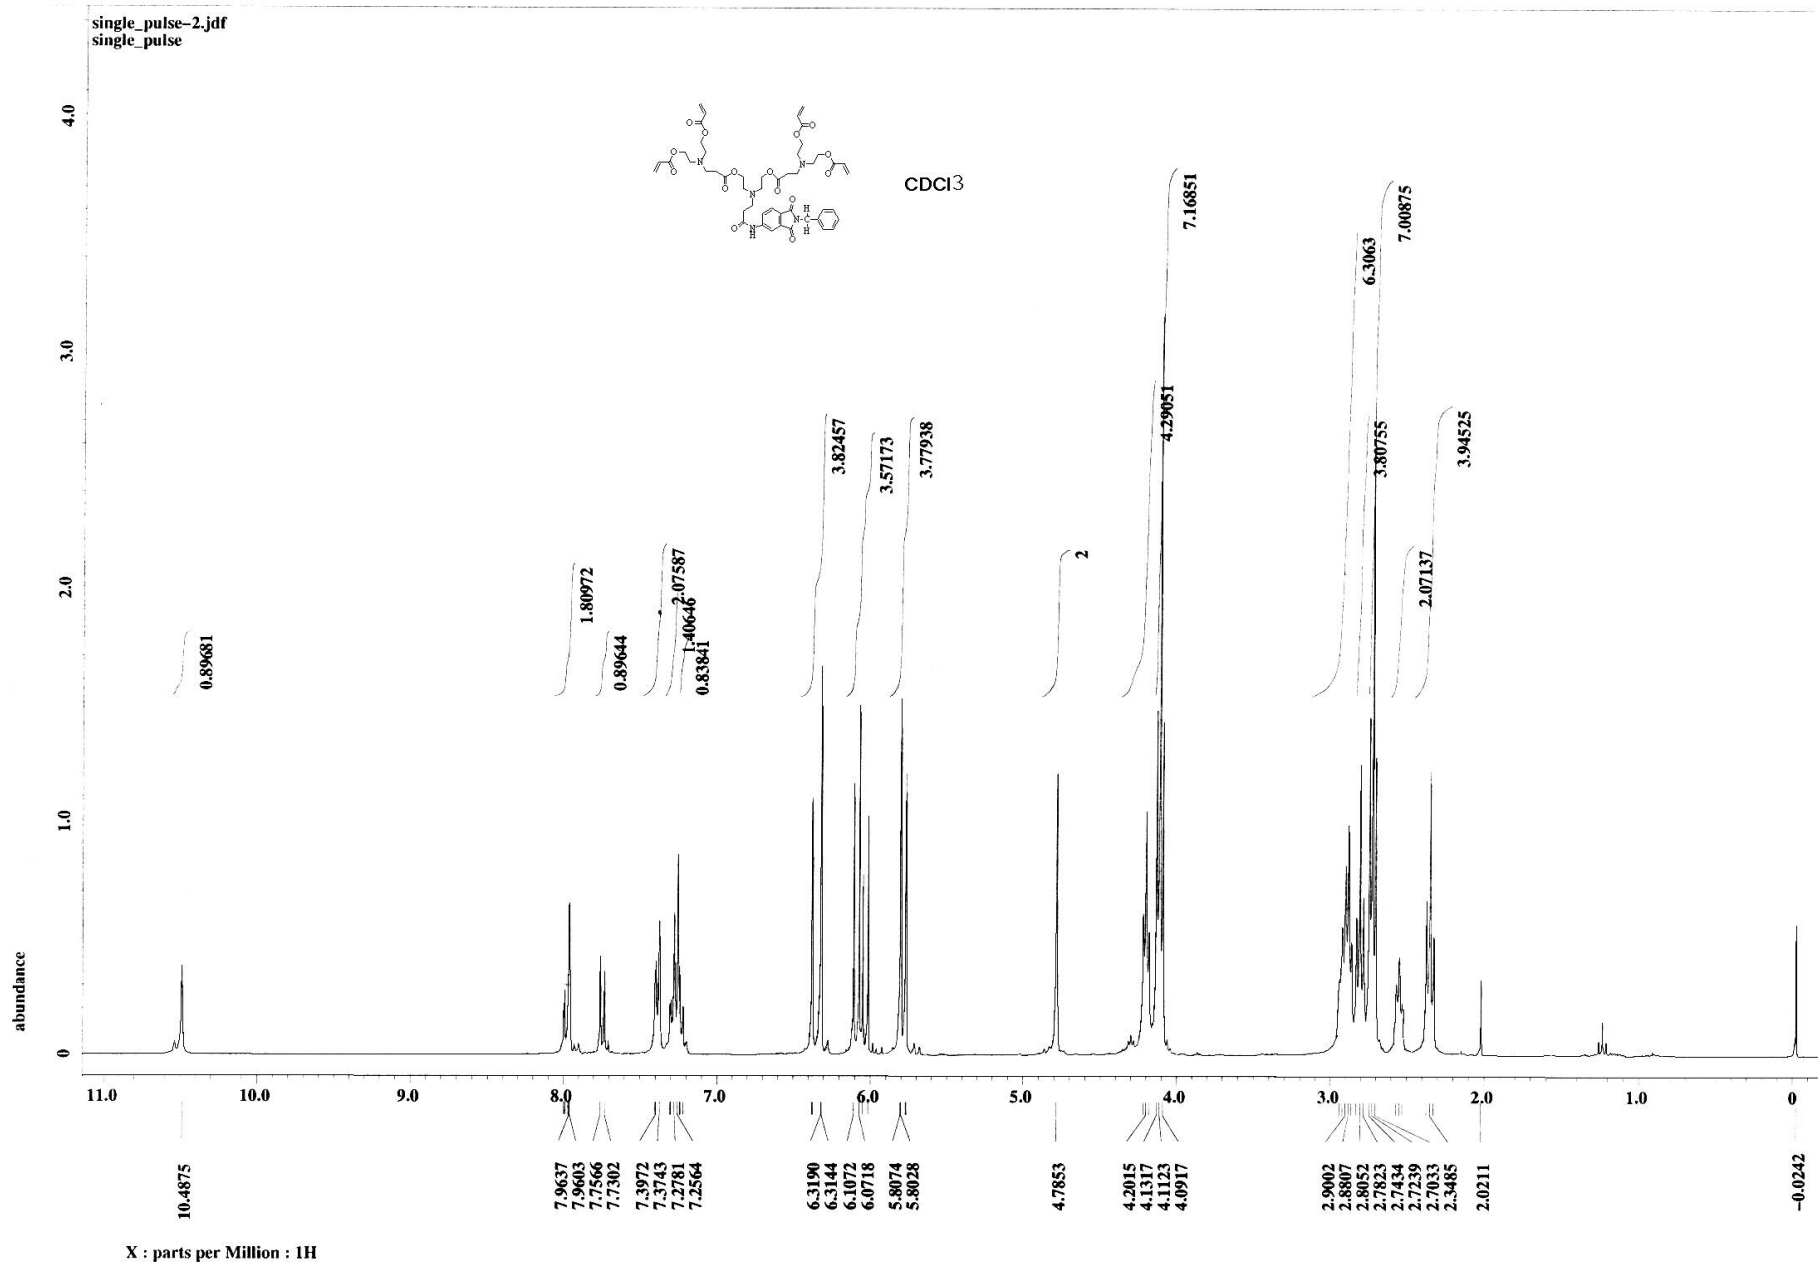

## Mass Spectrum List Report

## Analysis Info

Analysis Name sdx00117.d  
Method XQ Default.ms  
Sample Name n  
Comment 1366-1

Acquisition Date 12/26/05 10:32:22  
Operator Administrator  
Instrument Esquire-LC\_00136

## Acquisition Parameter

|                   |              |              |            |                          |             |
|-------------------|--------------|--------------|------------|--------------------------|-------------|
| Ion Source Type   | ESI          | Ion Polarity | Positive   | Alternating Ion Polarity | n/a         |
| Mass Range Mode   | Std/Normal   | Scan Begin   | 200.00 m/z | Scan End                 | 1500.00 m/z |
| Capillary Exit    | 157.1 Volt   | Skim 1       | 65.6 Volt  | Trap Drive               | 80.0        |
| Accumulation Time | 1233 $\mu$ s | Averages     | 10 Spectra | Auto MS/MS               | Off         |

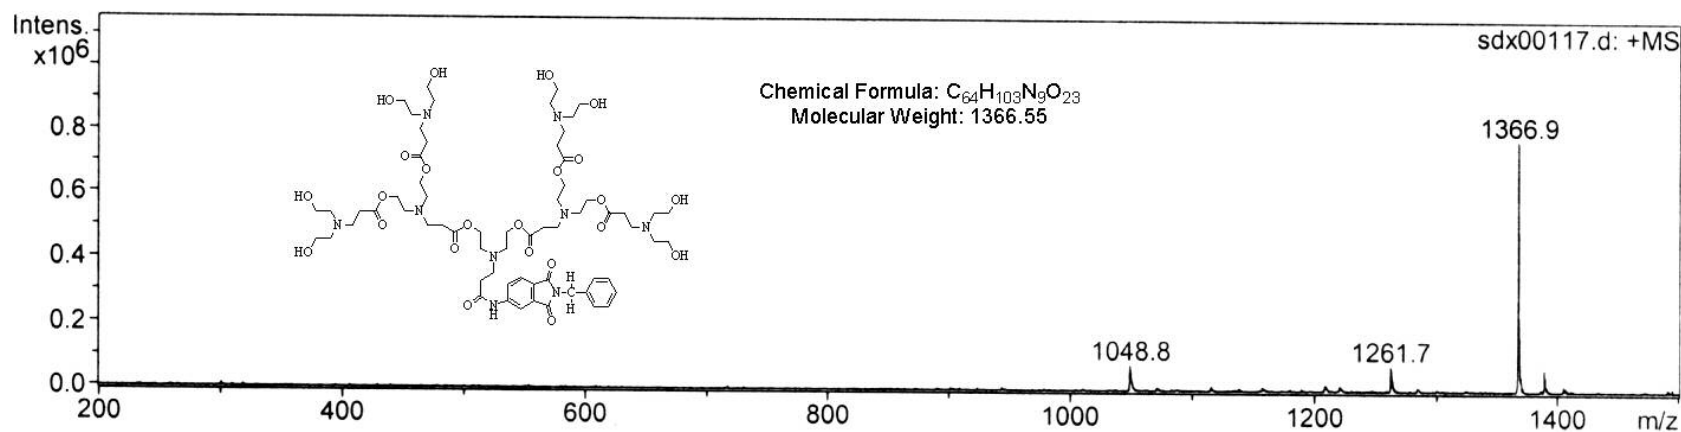

| #  | m/z    | I      | FWHM | S/N    |
|----|--------|--------|------|--------|
| 1  | 1048.8 | 76478  | 0.5  | 246.2  |
| 2  | 1049.5 | 63679  | 0.5  | 205.0  |
| 3  | 1050.6 | 28224  | 0.3  | 90.9   |
| 4  | 1261.7 | 76475  | 0.5  | 246.2  |
| 5  | 1262.5 | 66615  | 0.5  | 214.4  |
| 6  | 1263.5 | 31627  | 0.5  | 101.8  |
| 7  | 1366.9 | 775471 | 0.7  | 2496.4 |
| 8  | 1369.3 | 45097  | 0.4  | 145.2  |
| 9  | 1388.4 | 67630  | 0.4  | 217.7  |
| 10 | 1389.3 | 46416  | 0.5  | 149.4  |

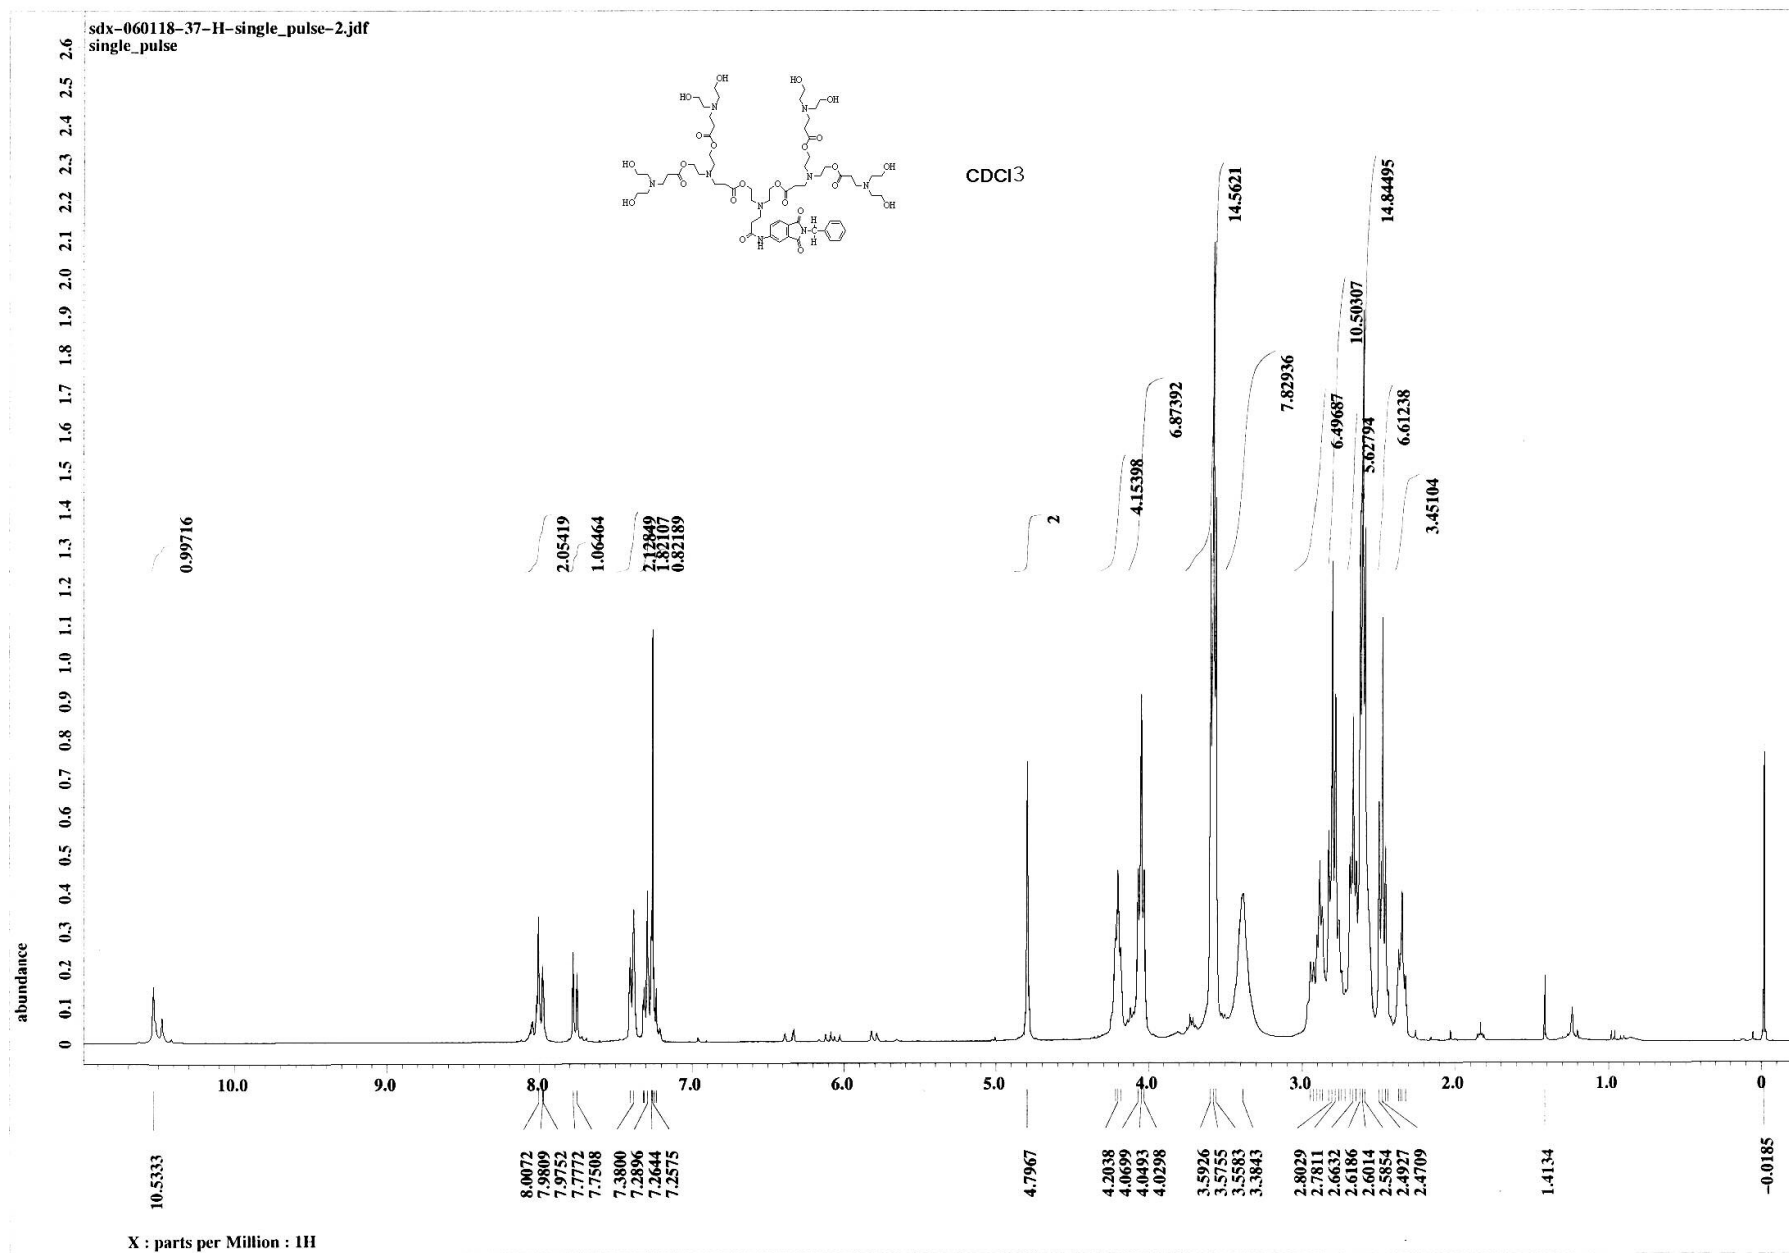

## Mass Spectrum List Report

## Analysis Info

Analysis Name sdx00127.d  
Method XQ Default.ms  
Sample Name 1  
Comment 1806-1

Acquisition Date 01/10/06 17:36:19  
Operator Administrator  
Instrument Esquire-LC\_00136

## Acquisition Parameter

|                   |              |              |            |                          |             |
|-------------------|--------------|--------------|------------|--------------------------|-------------|
| Ion Source Type   | ESI          | Ion Polarity | Positive   | Alternating Ion Polarity | n/a         |
| Mass Range Mode   | Std/Normal   | Scan Begin   | 200.00 m/z | Scan End                 | 2000.00 m/z |
| Capillary Exit    | 175.9 Volt   | Skim 1       | 75.9 Volt  | Trap Drive               | 99.9        |
| Accumulation Time | 9837 $\mu$ s | Averages     | 5 Spectra  | Auto MS/MS               | Off         |

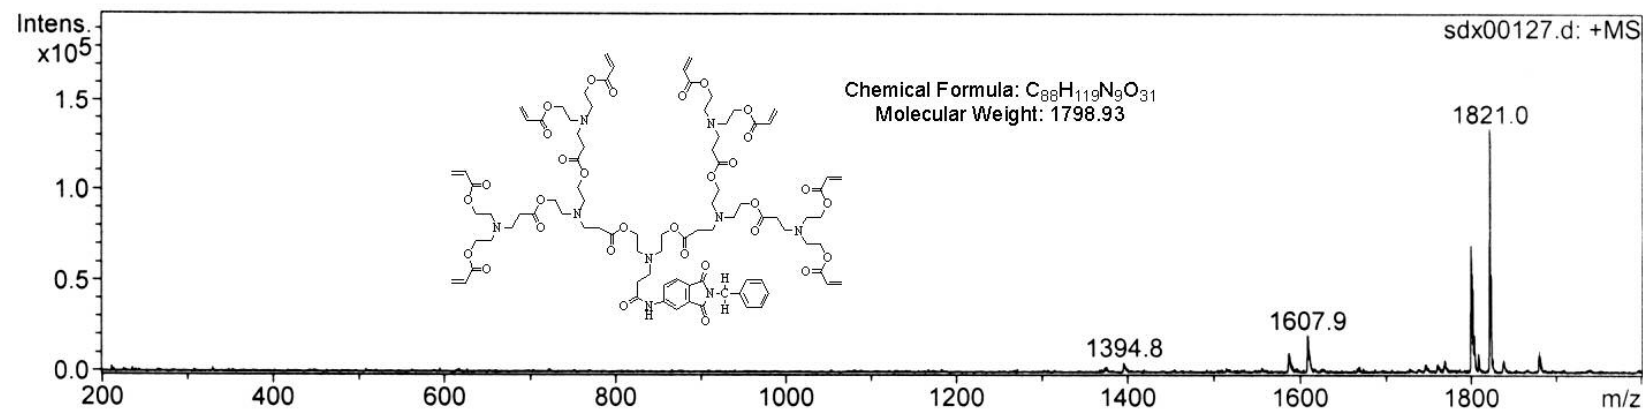

| #  | m/z    | I      | FWHM | S/N    |
|----|--------|--------|------|--------|
| 1  | 1607.9 | 20242  | 0.5  | 157.7  |
| 2  | 1608.8 | 19954  | 0.5  | 155.4  |
| 3  | 1799.0 | 69692  | 0.5  | 542.8  |
| 4  | 1799.5 | 63405  | 0.4  | 493.8  |
| 5  | 1800.5 | 53870  | 0.5  | 419.6  |
| 6  | 1801.5 | 45664  | 0.4  | 355.7  |
| 7  | 1803.2 | 20231  | 0.5  | 157.6  |
| 8  | 1821.0 | 134310 | 0.4  | 1046.1 |
| 9  | 1821.5 | 130161 | 0.4  | 1013.8 |
| 10 | 1822.9 | 53884  | 0.4  | 419.7  |

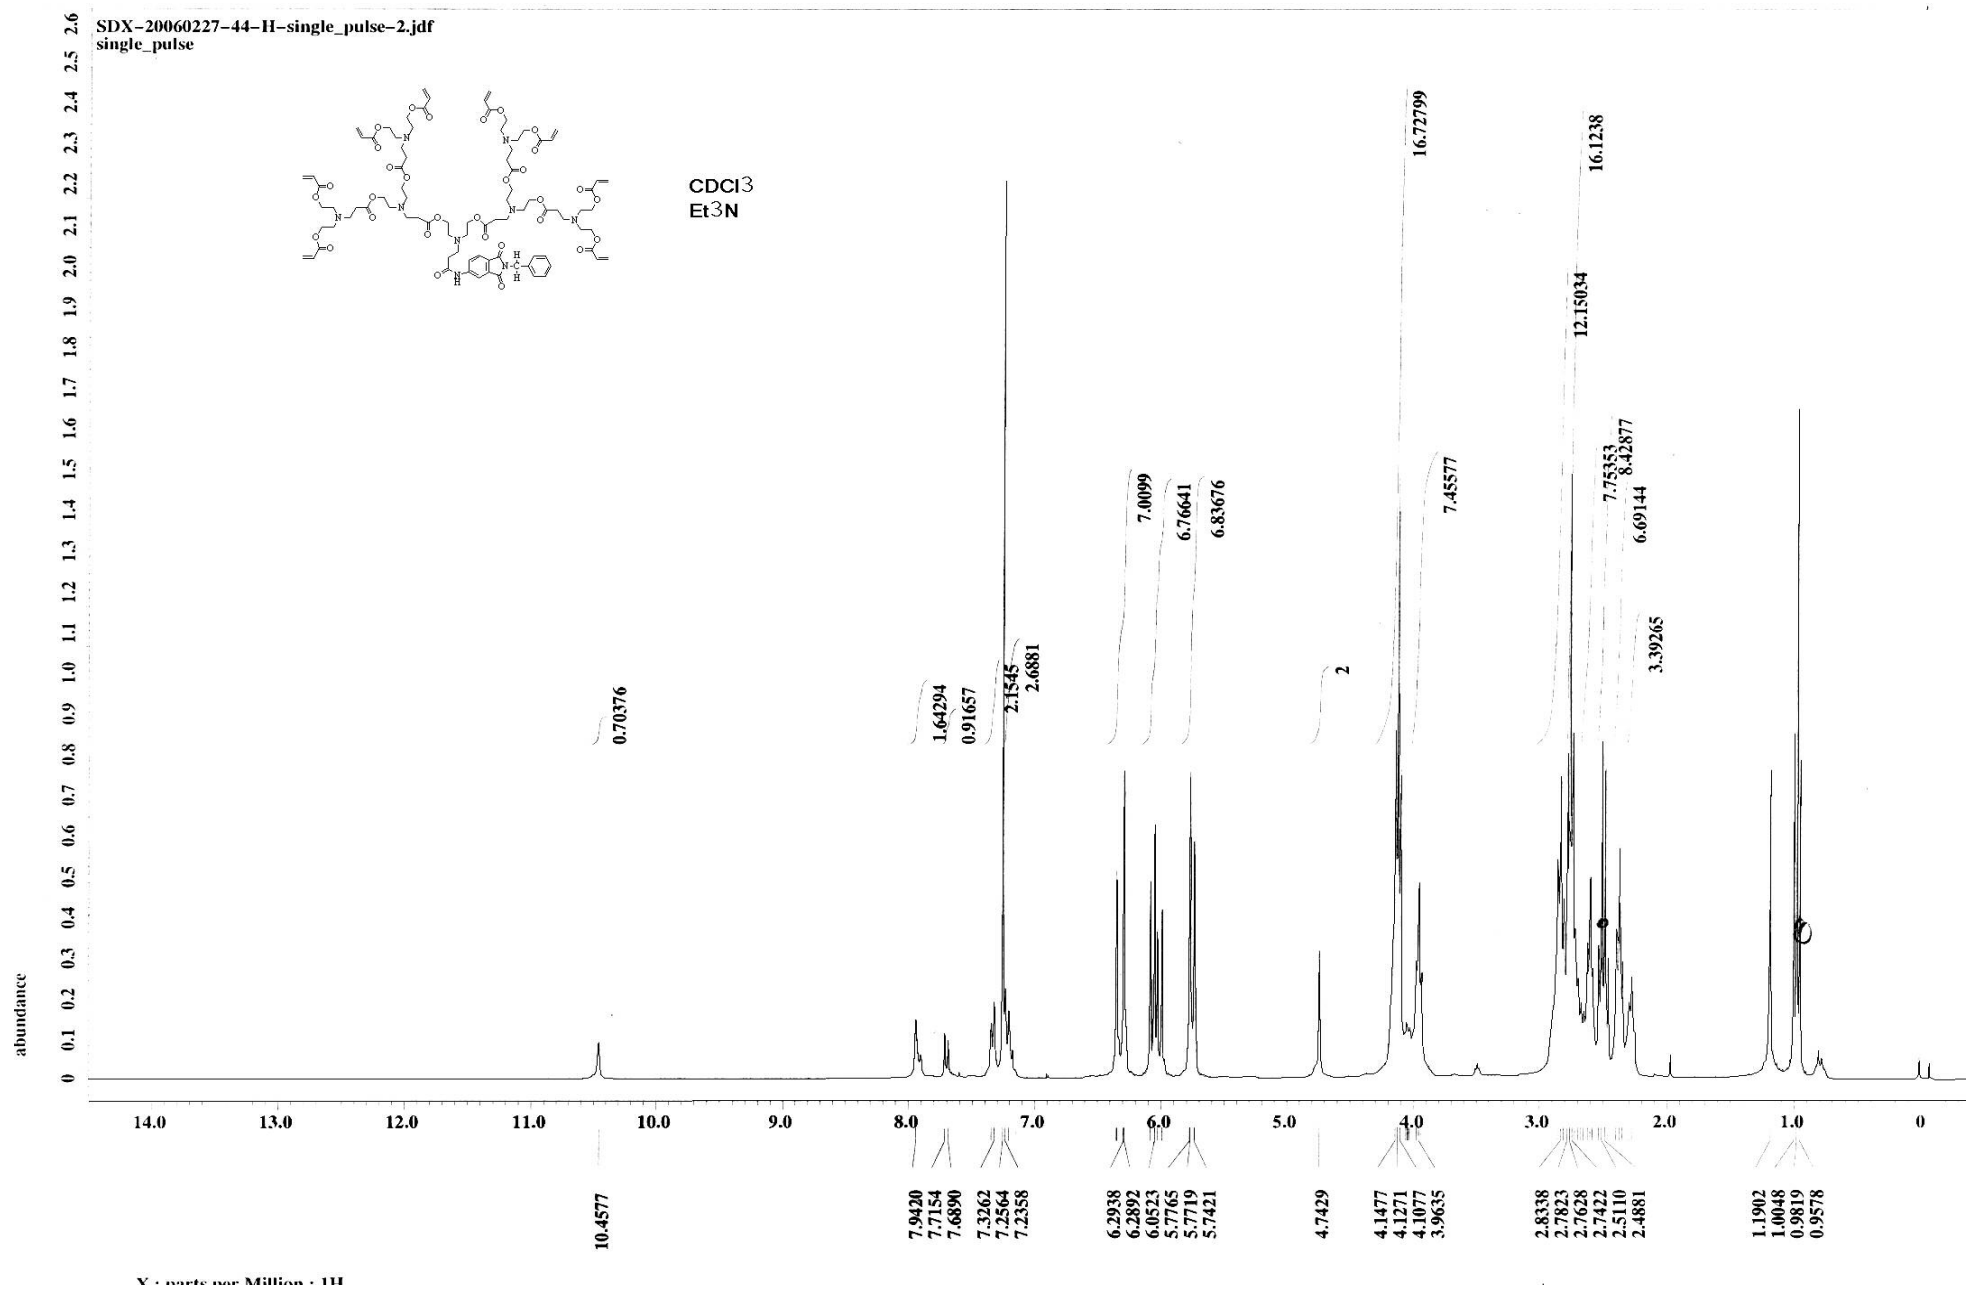

## Mass Spectrum List Report

## Analysis Info

Analysis Name sdx00184.d  
Method XQ Default.ms  
Sample Name Default  
Comment 2638

Acquisition Date 06/20/06 09:44:32  
Operator Administrator  
Instrument Esquire-LC\_00136

## Acquisition Parameter

|                   |               |              |             |                          |             |
|-------------------|---------------|--------------|-------------|--------------------------|-------------|
| Ion Source Type   | ESI           | Ion Polarity | Positive    | Alternating Ion Polarity | n/a         |
| Mass Range Mode   | Extended      | Scan Begin   | 2000.00 m/z | Scan End                 | 2800.00 m/z |
| Capillary Exit    | 208.5 Volt    | Skim 1       | 92.5 Volt   | Trap Drive               | 137.7       |
| Accumulation Time | 50000 $\mu$ s | Averages     | 5 Spectra   | Auto MS/MS               | Off         |

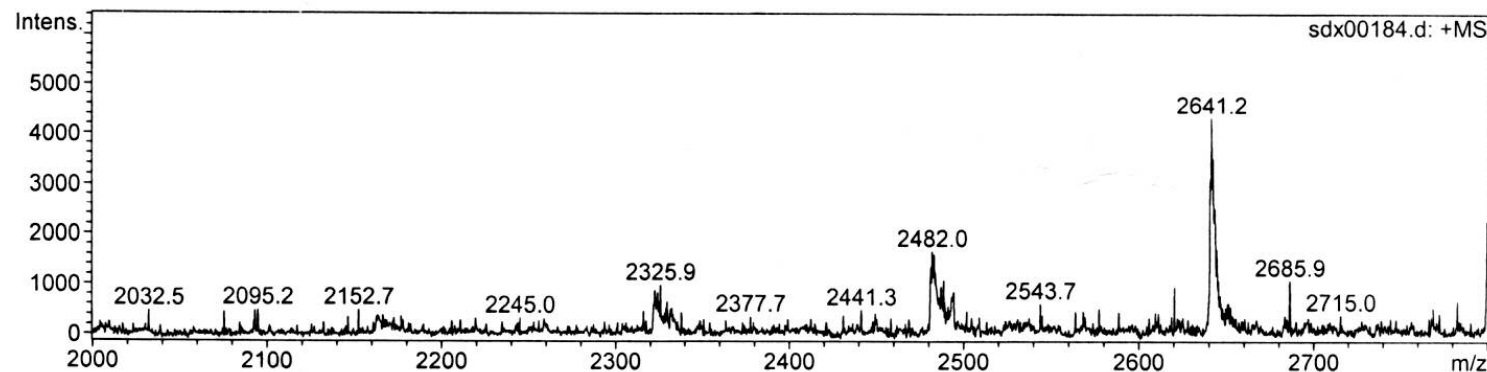

| #  | m/z    | I    | FWHM | S/N  |
|----|--------|------|------|------|
| 1  | 2481.2 | 1353 | 0.7  | 14.1 |
| 2  | 2482.0 | 1659 | 0.5  | 17.3 |
| 3  | 2483.0 | 1605 | 0.6  | 16.7 |
| 4  | 2483.8 | 1229 | 0.7  | 12.8 |
| 5  | 2488.5 | 1089 | 0.3  | 11.3 |
| 6  | 2640.5 | 3117 | 0.5  | 32.4 |
| 7  | 2641.2 | 4333 | 0.5  | 45.1 |
| 8  | 2642.0 | 3508 | 0.3  | 36.5 |
| 9  | 2643.0 | 2506 | 0.7  | 26.1 |
| 10 | 2644.1 | 1707 | 0.5  | 17.8 |

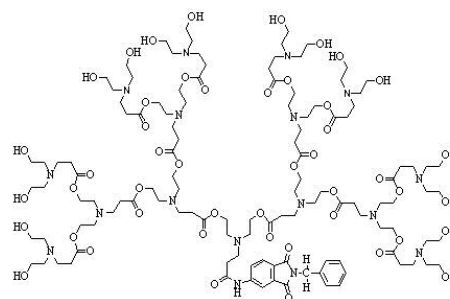

Chemical Formula:  $C_{120}H_{207}N_{17}O_{47}$   
Molecular Weight: 2640.01



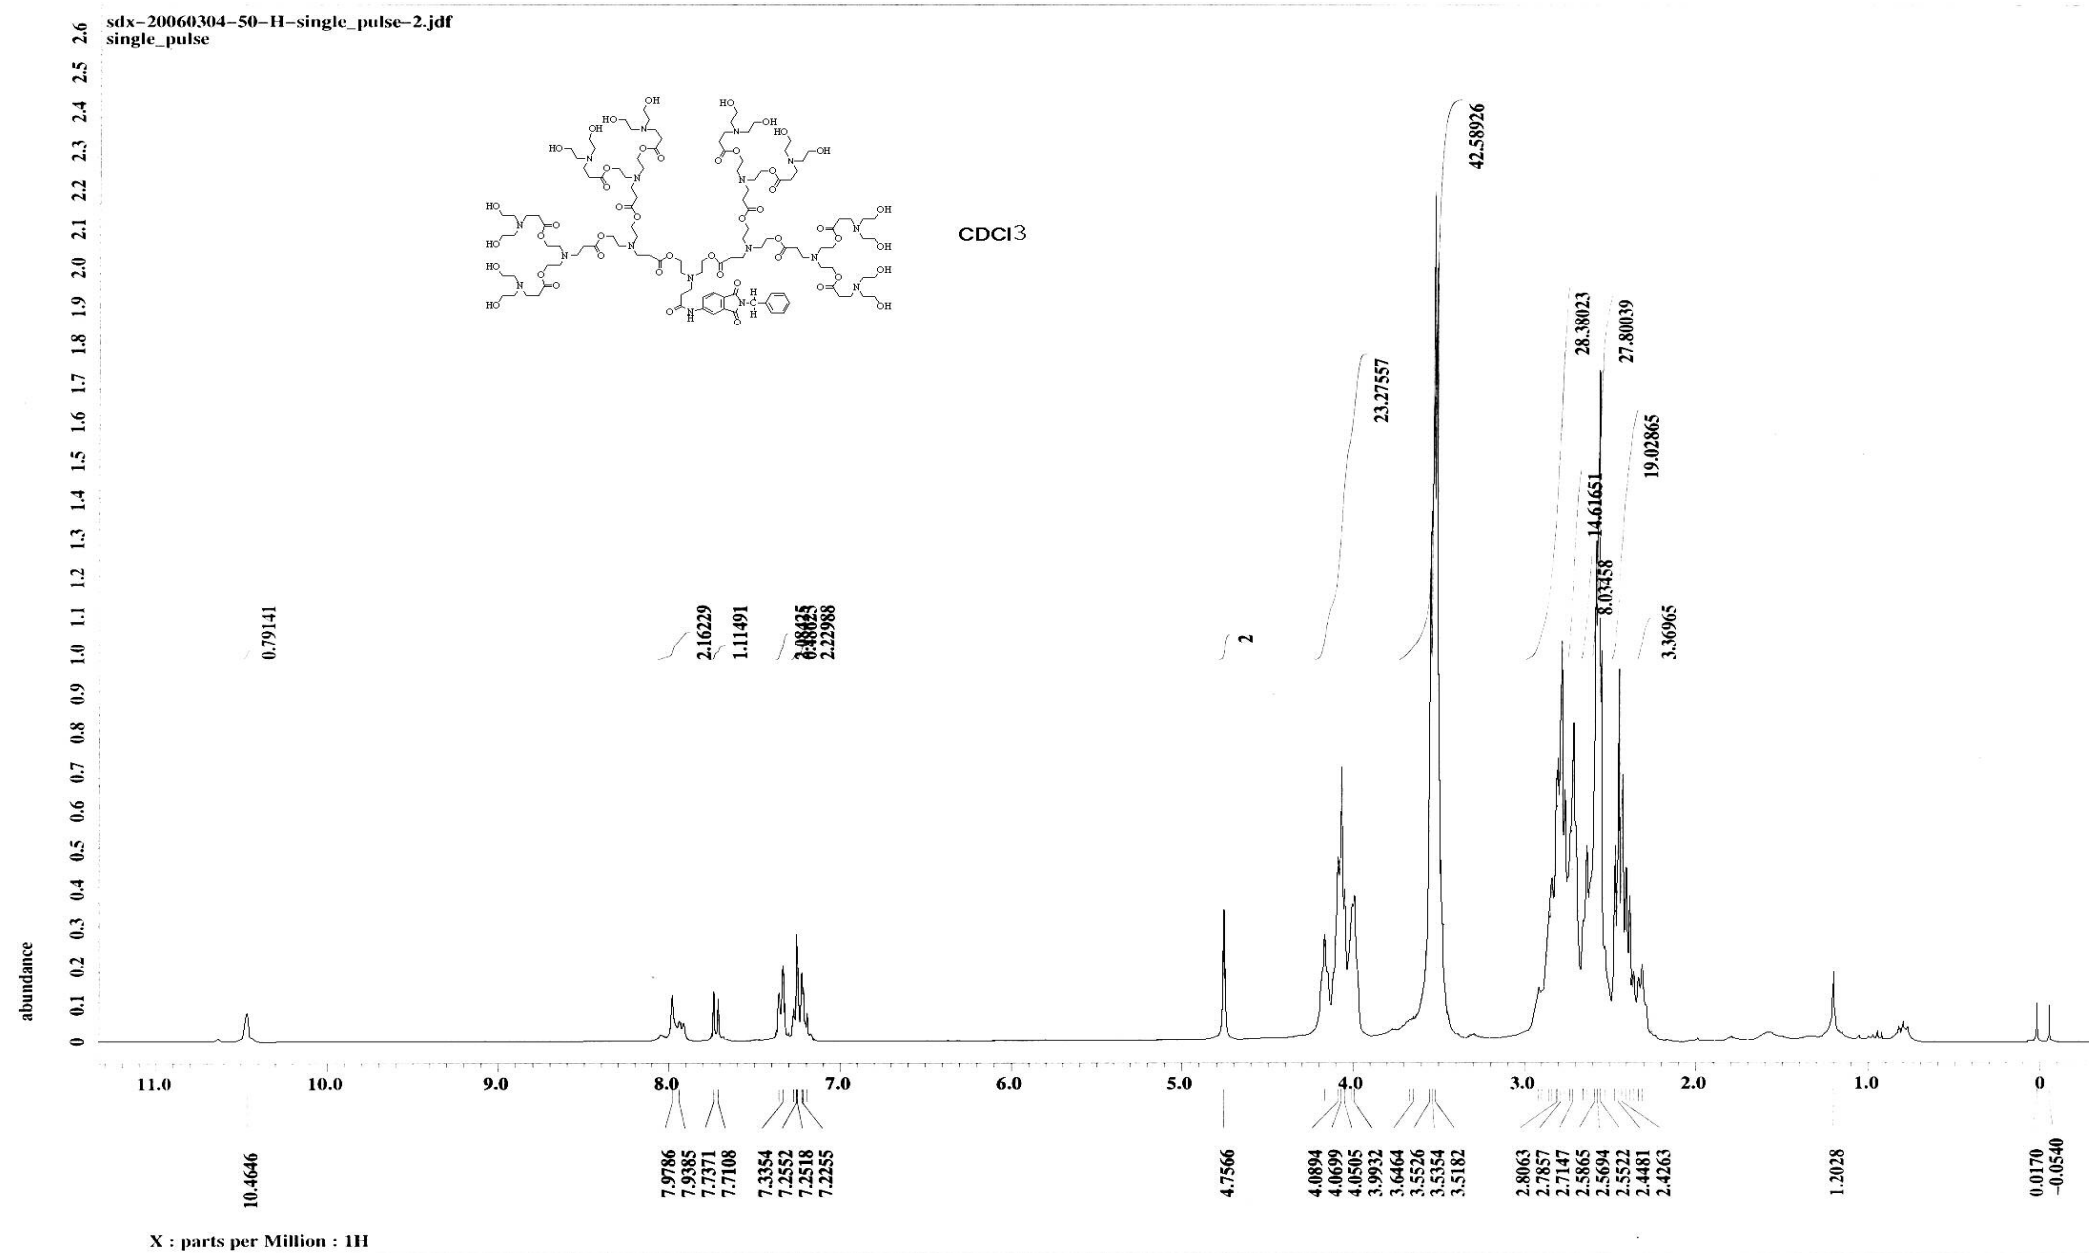

Supplement: Supplementary file 1 [file 4603087]
